# Supplementary material for: Snow microphysical processes in orographic turbulence revealed by cloud radar and in situ snowfall camera observations
Source: Copernicus journal article supplement (doi:10.5194/egusphere-2025-4517), 2025-09-26
Supplement: Supplementary file [file egusphere-2025-4517-AC1-supplement.pdf]

## Author's response to:

### RC#1

**<https://doi.org/10.5194/egusphere-2025-4517-RC1>**

Anton Kötsche<sup>1</sup>, Maximilian Maahn<sup>1</sup>, Veronika Ettrichrätz<sup>1</sup>, and Heike Kalesse-Los<sup>1</sup>

<sup>1</sup>Leipzig Institute for Meteorology (LIM), Leipzig University, Leipzig, Germany

**Correspondence:** anton.koetsche@uni-leipzig.de

Dear Reviewer,

Thank you for carefully reading the manuscript and pointing out several issues where the description needs to be refined for a better understanding. The requested clarifications and references to ambiguities contribute to the improvement of the manuscript.

To separate the Reviewer's comments and the author's response, we printed the comments in **black** and the response in blue. Excerpts of the manuscript with marked changes are pinned directly to the appropriate responses, with the indicated text location (e.g., line number) referring to the manuscript in the preprint.

Sincerely, on behalf of all authors

Anton Kötsche

## Summary of main changes of the manuscript:

- There was a minor bug in the processing of the turbulent layer height. The EDR data was re-gridded to fit the range resolution of the ARM wind profiles, effectively halving the range resolution of EDR. This EDR was then used to process TLH, TLH was then used for all statistics presented in the manuscript. Of course, this was not necessary for most of the statistics where EDR could have been kept at full resolution. We addressed that issue and reprocessed all statistics, the overall impact however was minimal.
- Some minor changes occurred in Fig. 9, there was a bug in the statistic where some of the "no turbulence" cases were falsely classified.
- A paragraph was added in L.168f. explaining the reasons for the used turbulent layer height retrieval
- As suggested by both reviewers, we created a schematic figure of main suspected processes in the turbulent layer (see Fig. 2) and added it to Sect. 3.3.
- A map of the measurement sites topography was added in the appendix of the manuscript (see Fig. B1). We also referenced the figure in Sect. 3.2.
- We removed backscattering differential phase cases from the statistics presented in Sect. 3.3 because it falsely affected overall  $K_{DP}$  magnitude. In the statistic presented in Fig. 11, minor changes in  $\Delta K_{DP}$  occurred. Details on how backscattering differential phase were provided in Sect. 2.1.2.
- In cases with shallow precipitating clouds, when their cloud top and the turbulent layer are superimposed, primary nucleation may be especially active and we can not exclude the impact of ice nucleation on our statistic. These cases almost never end up in the statistic because no data will be present above the turbulent layer. The few cases that would have been included in the statistic were removed. Additional argumentation was added in Sect. 2.7.

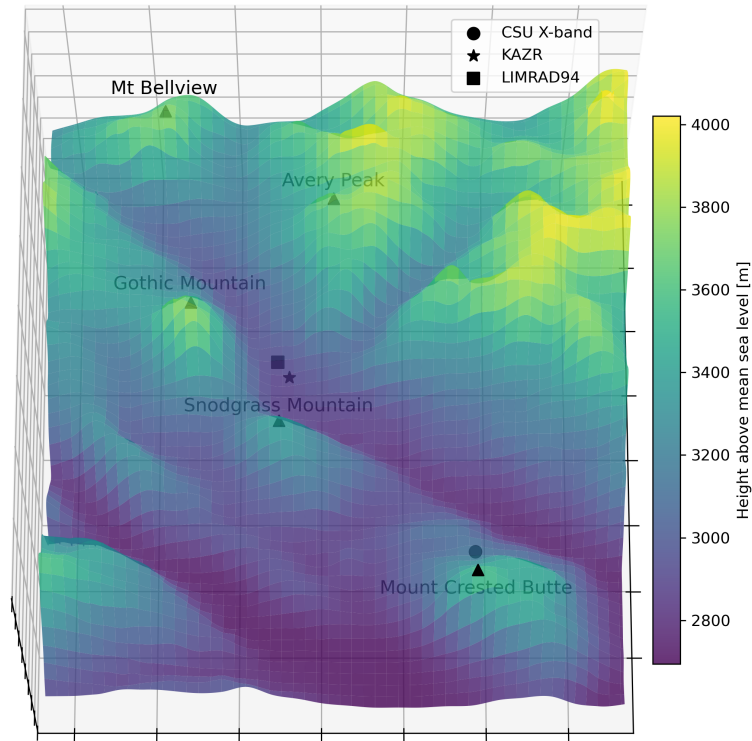

**Figure 1.** Elevation plot of the measurement site with all relevant mountain peaks and instrument locations marked.

## Response to RC#1:

### General comment #1: Map showing the local topography

*A map showing the local topography is missing. The text refers several times (ex: p.10, l.212-213 ; p.13, l.261) to the shape of the Gothic Mountain, but the reader does not have 1access to this information.*

Thank you for this suggestion, we created a map of the measurement sites topography and added it in the appendix of the manuscript (see Fig. 1). We also referenced the figure in Sect. 3.2.

**L291f.:**

(see Fig. B1 for a map of the local topography)

### General comment #2: Sect 3.3 schematics of the main processes

*Section 3.3 is important but very dense and not easy to follow. I suggest to add a schematics of the main processes and radar variables in each quadrant, to help the reader understand the various configurations and signatures involved in this interpretation. We added several references to the Figure in Sect. 3.3, see lines:*

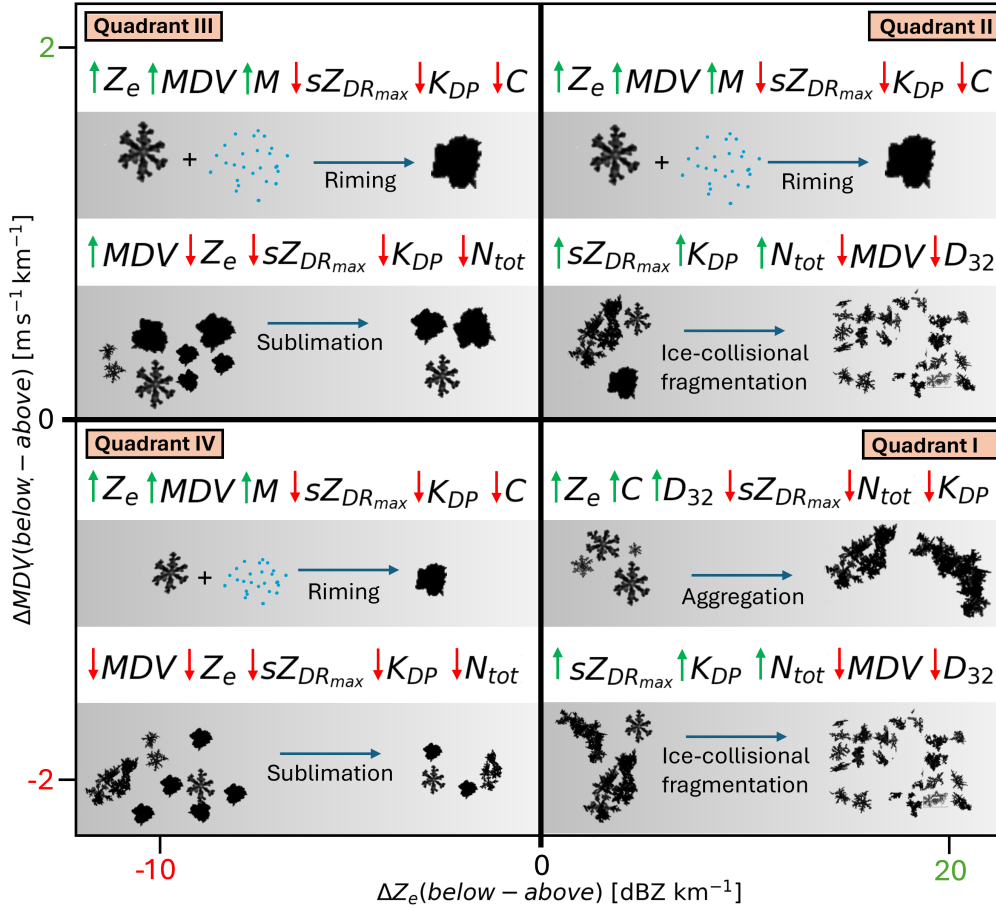

**Figure 2.** Conceptual diagram of the suspected (dominant) microphysical processes inside the turbulent layer, displayed similar to the four quadrants in Fig. 11. The impact of microphysical processes on radar and VISSS variables is also displayed qualitatively: Red downward facing arrows indicate a decrease of the respective variable, upward facing green arrows an increase. Note that for the radar variables ( $Z_e$ ,  $MDV$ ,  $sZ_{DR_{max}}$  and  $K_{DP}$ ), we can measure the change inside the turbulent layer. VISSS variables ( $N_{tot}$ ,  $C$ ,  $D_{32}$ ,  $M$ ) are measured below the turbulent layer. Their change due to the microphysical process is suspected based on the change of particle and PSD properties. If a variable is not depicted, no clear trend can be derived. The particle images were recorded by VISSS.

Thank you for suggesting this useful addition to the manuscript, we created a schematic figure (see Fig. 2) and added it to Sec. 3.3. References to the schematic Figure were added in L397, L428

### General comment #3: Arb. thresholds

*there are various thresholds or interpretation that appear somehow arbitrary. They should be better explained and justified. See specific comments below for more details.*

We agree that some of the chosen thresholds may seem arbitrary, we will do our best to explain our reasoning replying to your specific comments.

### Specific comments

- *P.1, l.23-24: wind shear can be in speed, in direction or both, but not only in both (as suggested by “and ” between “speed” and “direction”.*
- Thank you for pointing out that logic flaw, we changed the "and" to "and/or"
- *P.5, l.110: what method is used to estimate  $Kdp$  from  $\Phi dp$  and what is the final resolution of  $Kdp$ ?*
- $K_{DP}$  was calculated from  $\Phi_{DP}$  using a convolution with low-noise Lanczos differentiators with window length of 23 gates. This method provides results that are analogue to a moving window linear regression and is implemented in the python package wradlib (Heistermann et al., 2013). The final range resolution is about 12 m. The information of KDP calculation was added in Sect. 2.1.2.
- *FP.5, l.127: something is wrong or a definition is missing with “level2match”...*
- This is the name of the data product based on and as used in Maahn et al. (2024), we chose to use the same convention.
- *P.5, section 2.1.2: there is no mention of possible attenuation effects at W-band (due to atmospheric gases, liquid water and even ice particles). This should be (briefly) discussed as it may influence some of the interpretations.*
- $K_{DP}$  magnitude is not affected by attenuation, nor is  $sZ_{DR_{max}}$ , however  $sZ_{DR_{max}}$  can be affected by differential attenuation but this is negligible at the short measurement range we are considering. KAZR  $Z_e$  is corrected for gaseous attenuation by ARM. We added a clarifying sentence concerning  $Z_e$ :

**L192.:**

---

In KAZR data,  $Z_e$  is already corrected for gaseous attenuation (Johnson et al., 2023).
- *P.6, Fig.2: the height above ground at which the beams of KZAR and LIMRAD94 cross should be indicated (as it is constant, right?).*
- Thank you for this suggestion, we added it in Fig. 2 in the original manuscript (see Fig. 3).
- *P.7. l.150: the LIMRAD94 sampling volume is distant of 580 m of the KAZR sampling volume used to estimate the EDR, away from the mountain (i.e. downstream from KAZR)? Could this imply that the EDR may be lower at LIMRAD gate?*
- The center of the LIMRAD94 measurement volume at Gothic Mountain summit height is about 580 m south of the KAZR sampling volume, so the distance to Gothic Mountain summit is about the same. EDR should be identical.
- *P.7, Eq.2: why using a weighted mean to estimate TLH?*

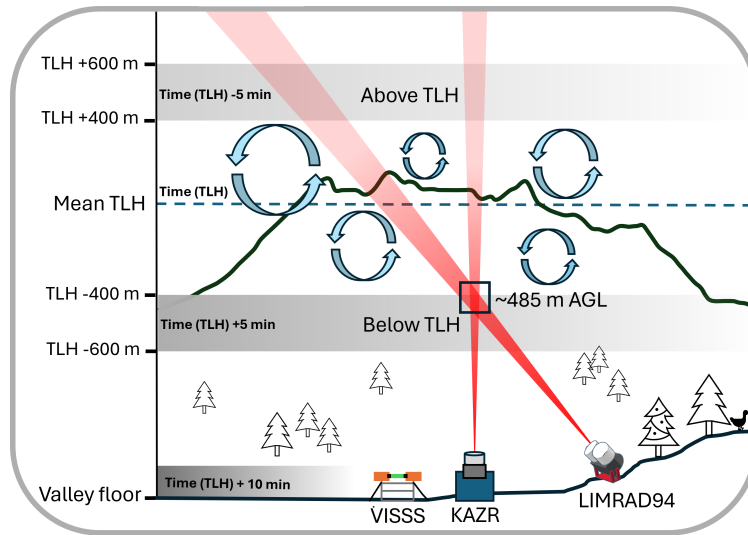

**Figure 3.** Updated Fig. 2

- The approach is similar to the calculation of the mean Doppler velocity, which is a commonly used approach. In the essence, we are not necessarily interested in the height of the maximum EDR (which is what a peak detection or a simple max. EDR approach would tell us). We are more interested in the true height of the center of the turbulent layer, knowing the turbulent layer may have a vertical extent of a few hundred meters. The vertical EDR profile often includes multiple peaks, hence using a max. EDR approach can lead to less accurate results. Please see Fig. 4 as an example of a typical EDR profile behind Gothic Mountain. Using the maximum EDR would result in a TLH around 3600 m AGL, which in this case would be almost at the bottom of the turbulent layer. Using a weighted mean (red line) pretty accurately catches the true center of the turbulent layer. We added the following sentence in the manuscript:

**L168f.:**

This methodology is similar to the calculation of the mean Doppler velocity, a widely applied technique in radar meteorology. Our aim is to determine the representative height of the center of the turbulent layer, acknowledging that such layers often span several hundred meters in the vertical. Vertical EDR profiles frequently exhibit multiple local maxima, therefore peak-finding algorithms can introduce substantial uncertainty. Also, the absolute maximum EDR value does not necessarily coincide with the layer center. Using a mean EDR weighted TLH therefore provides a more reliable estimate by accounting for the vertical distribution of EDR rather than relying on isolated peaks.

- P.7, l.156: Define AGL here as it is the first mention (it is done later). And mention the altitude of the top of Gothic Mountain.
- Thank you, we defined it first at L171 now.

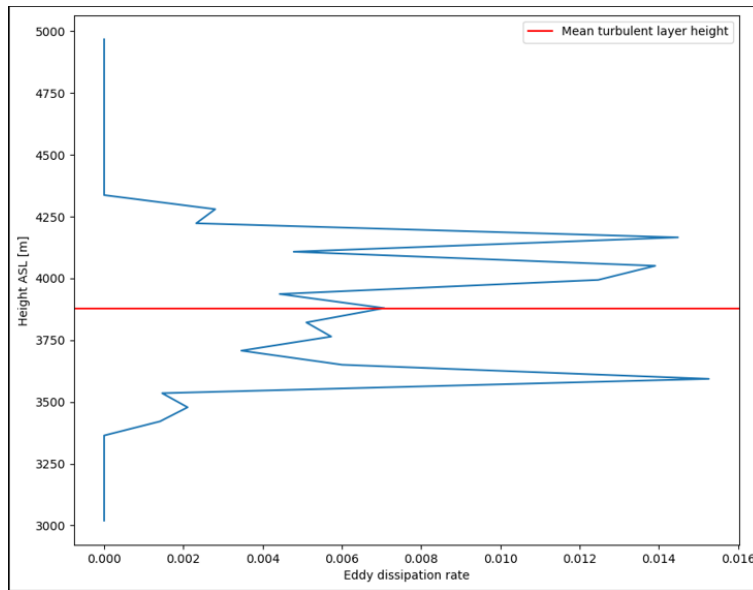

**Figure 4.** Exemplary EDR profile behind Gothic Mountain.

- P.8, l.174: how is this threshold value obtained? Please justify.
- We mention this threshold also in Sect. 2.4, it is the same one that Vogl et al. (2022) used to mask turbulence, as we use the same retrieval and radar as they did this threshold is justified.
- P.8, l.195: this sentence is a bit confusing: you explain in details in the introduction how turbulence can affect the ice crystals, and here state that the main changes are expected below this turbulent layer. Please elaborate.
- Agreed, this sentence is confusing. Of course we meant that the main changes leading to inhomogeneities in precipitation occur inside the turbulent layer, so it is more important that the measurement volumes are closely aligned below the turbulent layer. We adapted the sentence:

**L214f.:**

Since the most significant changes in precipitation ~~, along with potential inhomogeneities, are expected to occur below~~ are expected within the turbulent layer, ~~we~~ any resulting inhomogeneities in snow properties most likely occur below it, where LIMRAD94 and KAZR measurement volumes are closely aligned. We therefore argue that the combined dataset remains highly informative and suitable for the intended analysis.

- P.9, l.211: please elaborate on how the shower can influence the wind profile.
- We assume that the downdraft of the shower temporarily changed the wind direction to more north-westerly directions and also increased the wind speed in the boundary layer. We adapted the sentence:

**L241f.:**

Between 7 and 9 ~~UTC~~, ~~UTC~~ a stronger shower ~~alters~~ likely modifies the wind profile ~~, causing TLH of up to 1400 m~~ through its downdraft, slightly raising the TLH.

- P.10, l.217-218: “favorable for depositional growth”: moisture/saturation is also a key variable for deposition...
- True, we mean that in this temperature range, the Wegener-Bergeron-Findeisen process is most effective which causes the depositional growth of ice on expense of liquid water. We clarified in the text:

**L248f.:**

This temperature range, favorable for depositional growth of ice particles due to the Wegener-Bergeron-Findeisen Process (WBF, (Wegener, 1911; Bergeron, 1935)), combined with vertical air motion induced by turbulence causes these clouds to almost constantly produce precipitation, as shown by the VISSS particle number spectrogram in panel (d).

- P.10, l.219: *are size and complexity enough to identify graupel?*
- Aggregates tend to be larger than the average graupel from shallow convection, but also the complexity is a solid indicator (Garrett and Yuter, 2014). We also show in the VISSS images in Fig. 4. that there is mainly graupel present.
- P.10, l.221 + Fig.4: *are all the measured particles displayed? There seems to be a limited number of particles for such long periods (1h)... If not, how were those shown selected?*
- Particle images are selected based on the sharpness of the image and their size. Too blurred or too small particles are not shown. Also, there is a limit in how many particles are displayed in the box, correct. Particles in the box are plotted from big (top) to small (bottom).
- P.10, l.226: *any comments about the temperature inversion at the height of Gothic Mountain top (and associated drying)?*
- Subsidence is definitely present and the associated inversion is at the top of the cloud layer, so yes, entrainment is probably occurring. However, this is not the primary focus of the analysis.
- P.10, l.228: *how do you diagnose the occurrence of a MPC?*
- We concluded this based on the fact that we see a liquid layer in the cloud and at the same time detect ice particles at the ground which can only originate from this cloud.
- P.11, Fig.5: *the green solid line figures the dewpoint temperature, not the relative humidity. And what do the green dashed lines figure (the saturation mixing ratio)?*
- Thank you for pointing out the faulty description of the image, we fixed that. Green dashed lines are lines of equal saturation mixing ratio, correct. As this is a standard line in the Skew-T plot, we did not add a label.



- P.11, l.238: “mostly”: you have the distribution, you could be more quantitative (ex: x% of the values are below 1000m).
- Thank you for this suggestion, we changed the sentence as following:

**L271f.:**

~~The~~ In 65 % of the cases included in the statistic, the difference is less then 1000 m, showing a close collocation of LLB, CBH and TLH.

- P.12, Fig.6: you should provide the number of data points behind the curves displayed in Fig.6. Or at least mention how many “events” occurred in the considered time period.
- We added the following sentence:

**L269f.:**

In total, 63940 time stamps (5 min resolution) are included in the statistic.

- P.12, l.242.243: this “enhanced moisture convergence” is important but remains speculative. Any ways to strengthen this statement (high resolution NWP model runs for instance)?
- Unfortunately, we cannot provide more than speculations here.
- P.12, l.246-247: you could compare the turbulent layer top to see if does match with LLB... Focusing on the regions of sharp negative EDR gradient above the TLH, for instance.
- We appreciate the reviewer’s suggestion to compare the turbulent-layer top with the liquid-layer-base (LLB) height by examining regions of sharp negative EDR gradients above the TLH. While such an analysis is in principle possible, implementing it in a robust and physically consistent way would require substantial additional work. Moreover, the LLB height plays a comparatively minor role in the context of our study, which focuses primarily on microphysical processes within and below the turbulent layer. For this reason, we believe that a detailed LLB analysis would add limited value to the main objectives of the paper.
- P.12, l.251: using the same threshold in occurrence as for the lower limit at 800m (around 0.4-0.5), you end up with an upper limit around 1800-2000 m..
- Agreed, we changed the lower limit from 800 to 900 m
- P.17, l.298: particles produced by SIP would also be small with lower fall velocities. To be checked?
- This is what we investigate in the following chapter, yes.
- P.18, l.302: why no signal in Kdp? Small non-spherical ice splinters should increase Kdp, no?
- Yes, but this positive change in  $K_{DP}$  cannot be linked to MDV change in the histogram, thats why we do a detailed analysis in the quadrants.

- P.18, l.307 + Fig.11: VISSS does not see well small particles (mentioned resolution about 60 microns), could this introduce biases?
- Missing the very smaller particles might of course reduce the total number concentration of particles we can observe, which is of less interest for our study.
- P.18, l.319-320: “...be found in PSDs containing..”: I do not understand this sentence. How do you access the PSD?
- The PSD is provided by VISSS, quantities like D32 or mean complexity are based on the measured VISSS PSD.
- P.18, l.317, 318: a decrease, not an decrease.
- Thank you, we fixed that everywhere in the text.
- P.18, l.320-324: why would the MDV decrease for such aggregates (“An increase in  $Z_e$  in combination with an decrease of MDV”)
- This is explained in L335f.
- P.18, l.327: visible
- fixed.
- P.19, l.346-347: but an increased kinetic energy at the impact (so higher velocity) produces more splinters, no?
- Yes, but when looking at literature comparing splinter generation between graupel-graupel and graupel-snowflake collision (e.g. Grzegorzczuk et al. (2023)) we find that collision of two graupel particles produces much less splinters.
- P.19, l.352: you need supersaturation with respect to liquid water for dendritic growth. Do the radiosounding indicate such supersaturation at those times/heights?
- Yes they do. Please find an analysis of the max. relative humidity over ice inside TLH +/- 600 m in Fig. 5. Nearest neighbour was selected between sonde and radar data, tolerance +/- 3h. A sentence concerning supersaturation was added in Sect. 3.3. The following code was used for the calculation of RH ice

**L391f.:**

We analyzed radiosonde profiles measured during cases included in this statistic, almost all of them indicated supersaturation with respect to ice in the turbulent layer (not shown)

```
def relative_humidity_ice(RH_water, T):
    e_s_water = saturation_vapor_pressure_water(T)
    e_s_ice = saturation_vapor_pressure_ice(T)
    RH_ice = RH_water * (e_s_water / e_s_ice)
    return RH_ice
```

RH over ice from radiosonde (max between TLH +/-600m) for delta Ze >0 and delta MDV <0

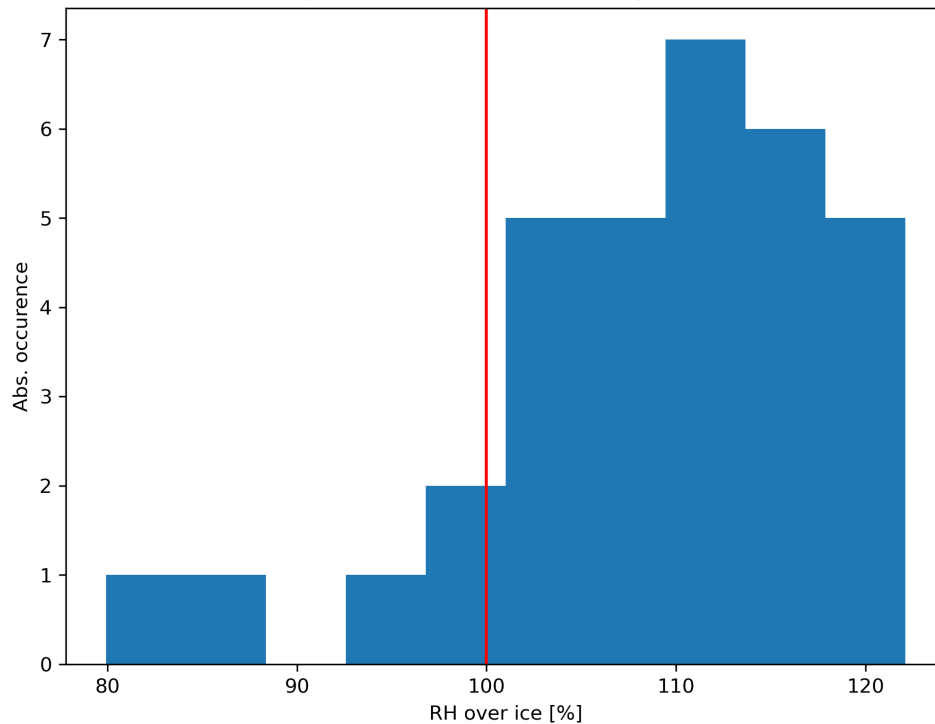

**Figure 5.** Max. relative humidity over ice inside TLH +/- 600 m where  $\Delta Z_e > 0$  and  $\Delta MDV < 0$

- *P.19, l.367-368: where is it explained how to use the complexity to identify ice crystal habits?*
- This can be for example found in Garrett and Yuter (2014). We added the following sentence in the VISSS description chapter:

**L145f.:**

---

The complexity can be used to distinguish between ice particle habits as for example demonstrated in Garrett and Yuter (2014).

- *P.22, item 3: could the analysis of sZe strengthen the interpretation? To see if the increase in Ze is due to large (relatively) fast falling particles (i.e. the aggregates) or to many smaller ones...*
- This could strengthen the argumentation, agreed. However, this analysis would be rather time expensive to perform. And because of the VISSS, we can prove the presence of aggregates connected to the  $Z_e$  increase. And if  $Z_e$  is proportional to  $D^4$  and even  $D^6$  for more rimed particles, the largest particles must be driving  $Z_e$ .

## References

- Bergeron, T.: On the physics of clouds and precipitation, Proc. 5th Assembly UGGI, Lisbon, Portugal, 1935, pp. 156–180, <https://cir.nii.ac.jp/crid/1573105975504427392>, 1935.
- Garrett, T. J. and Yuter, S. E.: Observed influence of riming, temperature, and turbulence on the fallspeed of solid precipitation, *Geophysical Research Letters*, 41, 6515–6522, <https://doi.org/10.1002/2014GL061016>, \_eprint: <https://onlinelibrary.wiley.com/doi/pdf/10.1002/2014GL061016>, 2014.
- Grzegorzczak, P., Yadav, S., Zanger, F., Theis, A., Mitra, S. K., Borrmann, S., and Szakáll, M.: Fragmentation of ice particles: laboratory experiments on graupel–graupel and graupel–snowflake collisions, *Atmospheric Chemistry and Physics*, 23, 13 505–13 521, <https://acp.copernicus.org/articles/23/13505/2023/>, publisher: Copernicus Publications Göttingen, Germany, 2023.
- Heistermann, M., Jacobi, S., and Pfaff, T.: An open source library for processing weather radar data (wradlib), *Hydrology and Earth System Sciences*, 17, 863–871, <https://hess.copernicus.org/articles/17/863/2013/>, publisher: Copernicus Publications Göttingen, Germany, 2013.
- Johnson, K., Jensen, M., and Giangrande, S.: Active Remote Sensing of CLOUDS (ARSCL) product using Ka-band ARM Zenith Radars (ARSCLKAZRIKOLLIAS), 2021-09-01 to 2023-06-06, ARM Mobile Facility (GUC), Gunnison, CO; AMF2 (main site for SAIL) (M1) [data set], <https://doi.org/10.5439/1228768>, publication Title: Atmospheric Radiation Measurement (ARM) user facility, 2023.
- Maahn, M., Moisseev, D., Steinke, I., Maherndl, N., and Shupe, M. D.: Introducing the Video In Situ Snowfall Sensor (VISS), *Atmospheric Measurement Techniques*, 17, 899–919, <https://doi.org/10.5194/amt-17-899-2024>, publisher: Copernicus GmbH, 2024.
- Vogl, T., Maahn, M., Kneifel, S., Schimmel, W., Moisseev, D., and Kalesse-Los, H.: Using artificial neural networks to predict riming from Doppler cloud radar observations, *Atmospheric Measurement Techniques*, 15, 365–381, <https://doi.org/10.5194/amt-15-365-2022>, publisher: Copernicus GmbH, 2022.
- Wegener, A.: *Thermodynamik der atmosphäre*, J. A. Barth, <https://books.google.de/books?id=BMMxAAAAMAAJ>, 1911.
